# Supplementary material for: Zircon water content: reference material development and simultaneous measurement of oxygen isotopes by SIMS
Source: Royal Society of Chemistry journal article supplement (doi:10.1039/c9ja00073a), 2019-01-01
Supplement: c9ja00073a1.xlsx [file c9ja00073a1.xlsx]

## Sheet: Sheet1
Table 1 Analytical results of FTIR
Sample	Thickness1	Thickness2	Ax(cm-2)3	Ay(cm-2)	Az(cm-2)	Ai(cm-2)	H2O4	SD(%)
ZG7	1.093	1.143	247.9	275.9	252.46	776.26	82.9829	2.3
ZG6	0.858	1.425	109.7	242.93	288.46	641.09	68.5331	5.7
D16314-2	1.465	1.379	94.79	87.41	62.63	244.83	26.1725	1.7
91500	0.57	0.776	142.43	175.38	214.28	532.09	56.8809	3.5
GJ-1	0.78	0.771	309.48	322.99	358.93	991.4	105.981	5.7
ZG3	1.294	1.776	135.41	108.76	142.68	386.85	41.3546	1.5
D15395-3	0.85	0.705	1371.11	1651.73	1702.68	4725.52	505.162	3.7
D15395-4	0.881	0.871	2502.63	2475.42	2610.56	7588.61	811.229	8.2
1 is the thickness of zircons' direction x and y.The unit is mm
2 is the thickness of zircons' direction z. The unit is mm
A is the integrated areas，which have been normalized to 1 cm thickness.
