# Supplementary material for: Zircon water content: reference material development and simultaneous measurement of oxygen isotopes by SIMS
Source: Royal Society of Chemistry journal article supplement (doi:10.1039/c9ja00073a), 2019-01-01
Supplement: c9ja00073a3.xlsx [file c9ja00073a3.xlsx]

## Sheet: Sheet1
Table 3 Summary of average 16O1H/16O and δ18Oc
Sample No.	Average 11			Average 22			Average 33
	16O1H/16O	2se（%）	No.	16O1H/16O	2se（%）	No.	16O1H/16O	2se（%）	δ18Oc4	2sd4	No.
ZG7	1.91077e-05	12.5146	15	1.86148e-05	5.60752	12	1.84724e-05	1.93943	6.04089	0.316605	11
ZG6	1.19222e-05	20.3798	15	1.14225e-05	10.9852	10	1.12401e-05	4.65657	4.79025	0.355945	9
D16314-2	2.93247e-06	4.36462	15	2.9322e-06	4.52917	14	2.9322e-06	4.52917	5.31273	0.310627	14
91500	1.38685e-05	11.9206	15	1.37021e-05	7.84205	14	1.37021e-05	7.84205	9.94793	0.297669	14
GJ-1	1.90428e-05	3.40574	15	1.90267e-05	3.47143	14	1.89091e-05	1.13641	6.13014	0.402539	12
ZG3	9.27208e-06	1.3218	15	9.28209e-06	1.06085	14	9.28209e-06	1.06085	12.4519	0.394651	14
D15395-4	0.000165351	4.68127	15	0.000165351	4.68127	15	0.000165351	4.68127	5.01032	0.317353	15
D15395-3	0.000107647	16.2013	15	0.000107647	16.2013	15	0.000107412	5.64013	4.92349	0.332762	11
1 no any data was eliminated
2 data with unexpected intertal error was eliminated
3 data beyond the 3sd error was eliminated
3 the unit is permil
