# Supplementary material for: Zircon water content: reference material development and simultaneous measurement of oxygen isotopes by SIMS
Source: Royal Society of Chemistry journal article supplement (doi:10.1039/c9ja00073a), 2019-01-01
Supplement: c9ja00073a4.xlsx [file c9ja00073a4.xlsx]

## Sheet: Sheet1
Table 4 Calibrated water contents
Sample	ZG7	ZG64	D16314-2	91500	GJ-1	ZG3	D15395-4	D15395-3
H2O （ppm）	95.4516	60.1553	19.6101	72.1709	97.5829	50.5998	812.272	529.508
Error1	3.49394	-3.25506	-7.16693	5.92398	-2.06289	5.02705	11.6556	-10.5062
1 error is calculated as (H2O calibrated-H2O FTIR)/(H2O calibrated+ H2O FTIR)*50%. Negative error means calibrated SIMS results is less than that of FTIR
